# Supplementary material for: Macrophage Deletion of SOCS1 Increases Sensitivity to LPS and Palmitic Acid and Results in Systemic Inflammation and Hepatic Insulin Resistance
Source: PubMed Central journal article supplement — Diabetes. 2011 Jul 18;60(8):2023–31. doi: 10.2337/db11-0259 (PMC3142066; doi:10.2337/db11-0259), 2011-07-18

SUPPLEMENTARY DATA

**Supplementary Table 1.** Inflammatory mRNA expression in bone marrow derived macrophages of SOCS1 *LysM-cre* and control mice.

|                       | <i>Il6</i> | <i>Tnfa</i> | <i>Il1b</i> |
|-----------------------|------------|-------------|-------------|
| SOCS1 <i>LysM-cre</i> | 1.1±0.4*   | 1.2±0.4*    | 1.04±0.1*   |
| Control               | 0.6±0.3    | 0.5±0.1     | 0.8±0.1     |

Data are means ± SEM, n=5 animals per group. \* P<0.05 relative to littermate control.

**Supplementary Table 2.** Parameters during the euglycaemic-hyperinsulinemic clamp

|                                    | Control      | SOCS1 <i>LysM-cre</i> |
|------------------------------------|--------------|-----------------------|
| Clamp glucose (mmol/L)             | 5.2±0.1      | 5.1±0.1               |
| Clamp Insulin (pmol/l)             | 1827.5±451.7 | 1875.6±556.3          |
| Basal glucose turnover (mg/kg/min) | 40.2±4.59    | 35.6 ±2.79            |
| IS-GDR (mg/kg/min)                 | 33.7±6.54    | 34.3±3.79             |

Data are means ± SEM, n=12 animals per group. IS-GDR = insulin stimulated glucose disposal rate.

SUPPLEMENTARY DATA

**Supplementary Table 3. Liver Enzymes in SOCS1 *LysM-cre* and wildtype mice**

|                       | Control  | SOCS1 <i>LysM-cre</i> | P value |
|-----------------------|----------|-----------------------|---------|
| ALT (U/L)             | 26±3.3   | 119±25.3              | P=0.03  |
| AST (U/L)             | 100.6±6  | 250±45                | P=0.04  |
| ALP (U/L)             | 103±14.9 | 119 ±11.7             | P=ns    |
| Bilirubin<br>(μmol/L) | 3.8±0.6  | 3.3±0.6               | P=ns    |
| Albumin (g/L)         | 12±0.3   | 13±0.6                | P=ns    |

Data are means ± SEM, n=5 animals per group. ns=not significant

SUPPLEMENTARY DATA

**Supplementary Figure 1. Preserved skeletal muscle glucose uptake in SOCS1 *LysM-cre* mice despite the presence of inflammation.** (A) Basal and insulin stimulated glucose uptake are similar between SOCS1 *LysM-cre* and control mice. (B) Akt phosphorylation is unimpaired in SOCS1 *LysM-cre* mice. (C) Expression of muscle cytokine levels by RT-PCR analysis is increased in SOCS1 *LysM-cre* mice. (D) Skeletal muscle AMPK phosphorylation is not decreased in SOCS1 *LysM-cre* mice. White bars = FL/FL controls and black bar = SOCS1 *LysM-cre* mice.

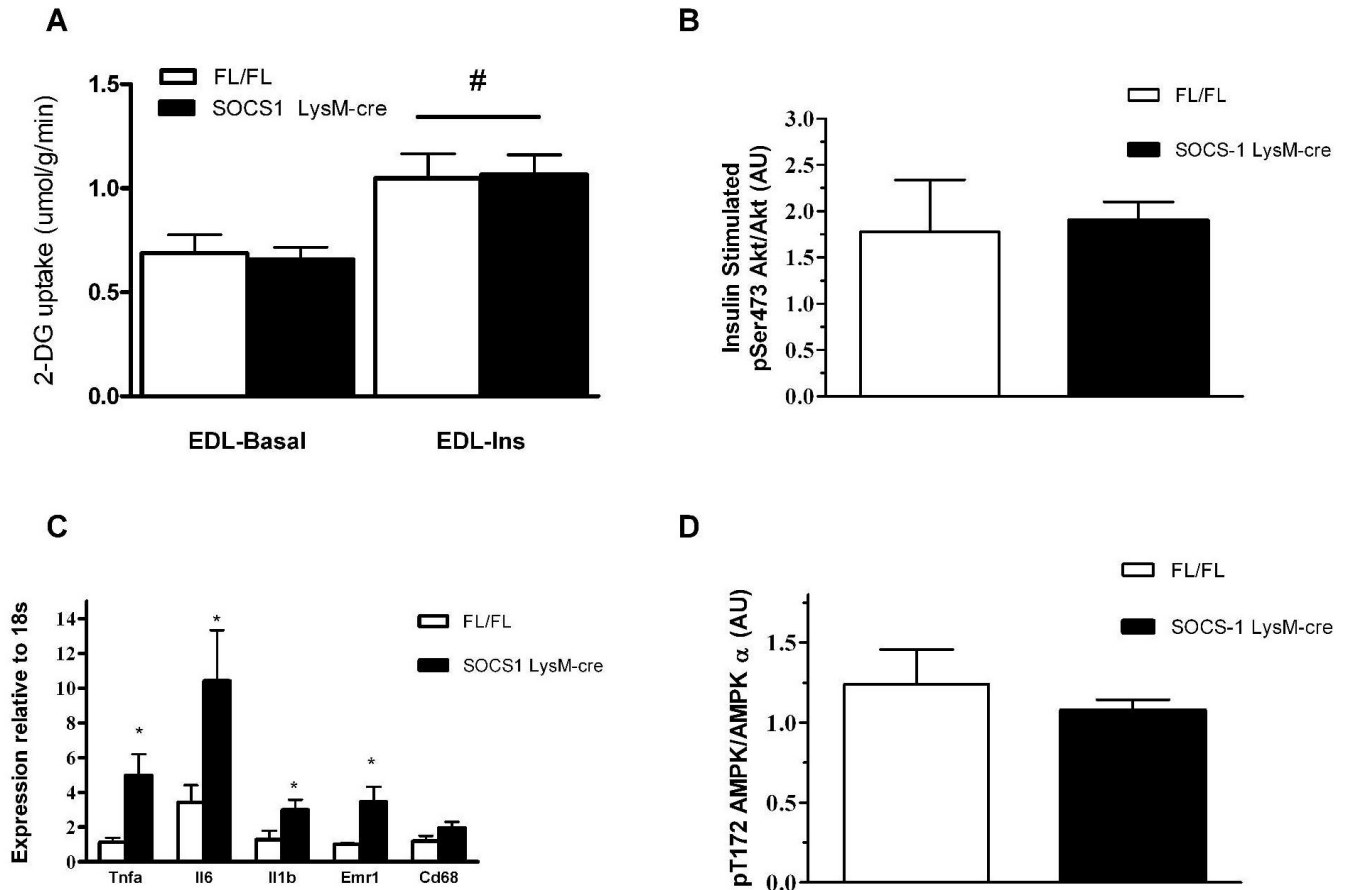

Supplement: supp_db11-0259_DB110259SupplementaryData.pdf [file supp_db11-0259_DB110259SupplementaryData.pdf]
